# Supplementary material for: Randomised Controlled Feasibility Study of the MyHealthAvatar-Diabetes Smartphone App for Reducing Prolonged Sitting Time in Type 2 Diabetes Mellitus
Source: MDPI journal article supplement (doi:10.3390/ijerph17124414), 2020-06-19
Supplement: s1 [file s1]

# File S1: Intervention text message content

## Week 1: G.R.O.W

*What sitting time goals do you hope to achieve?*

Sitting for shorter durations, sitting less throughout the whole day, getting up and moving around more often?

*How can you make your goals SMART?*

Specific, Measureable, Achievable, Relevant and Timely

## Week 2: G.R.O.W

*How would sitting less benefit you?*

Better quality of life, more mobile, weight loss, better glucose control, something else?

*What are the negative outcomes of sitting too much?*

Poor health/ fatigue/ weight issues/ low fitness

## Week 3: G.R.O.W

*What has stopped you from sitting less in the past?*

Time, opportunity, work, cost, motivation, something else?

*What have you tried before to help you to sit less?*

Changing your environment, making plans to sit less, giving yourself cues/reminders to move

## Week 4: G.R.O.W

*What can you do differently going forward, to help you reach your goal of sitting less?*

Assign a certain day or time, set an alarm, get others involved, something else?

*When will you know you have reached your intended goal?*

When I lose X amount of weight / when I complete X amount of steps per day

## Week 5: G.R.O.W

*What support is available to you to help you to sit less?*

Mobile phone app, internet, diabetes support groups, NHS website, something else?

*Who can help you to reach your goal?*

Peers / family / friends / colleagues / support groups

---

**Week 6: G.R.O.W**

*How does it feel when you are meeting your goal?*

Positive, happy, energetic

*How can you continue to make positive changes?*

Make plans, ask friends to help

**Week 7: G.R.O.W**

*On a scale of 0–10, how important is it for you to make changes to help you to sit less?*

What made you chose this number?

*What are your next steps to maintaining and reaching new goals?*

Working with friends, SMART goals, something else?

**Week 8: G.R.O.W**

*What barriers might you have to overcome to reach and maintain your goal?*

Work, time, money, transport, motivation, something else?

*How will you reward yourself when you complete your intended goal?*

Buy a new outfit / book a holiday / take some time to relax / something else?
