# Supplementary material for: Randomised Controlled Feasibility Study of the MyHealthAvatar-Diabetes Smartphone App for Reducing Prolonged Sitting Time in Type 2 Diabetes Mellitus
Source: MDPI journal article supplement (doi:10.3390/ijerph17124414), 2020-06-19
Supplement: s1 [file s1]

**Table S2.** Within and between-group differences from baseline to follow-up for psychological outcomes. Data presented as mean (SD).

| Variable                      | Control baseline | Control follow-up | Within-group differences | Intervention baseline | Intervention follow-up | Within-group differences | Between group differences | Cohen's d |
|-------------------------------|------------------|-------------------|--------------------------|-----------------------|------------------------|--------------------------|---------------------------|-----------|
| Theory of Planned Behaviour   |                  |                   |                          |                       |                        |                          |                           |           |
| Attitude                      | 5.2 (2.0)        | 5.5 (1.6)         | 0.3 (2.2)                | 5.4 (0.6)             | 6.1 (0.6)              | 0.6 (0.8)                | 0.4 (2.1)                 | 0.18      |
| Subjective norms              | 4.4 (1.3)        | 4.6 (0.8)         | 0.2 (1.2)                | 4.5 (1.0)             | 4.1 (1.1)              | -0.4 (1.3)               | -0.6 (2.2)                | 0.34      |
| Perceived behavioural control | 4.3 (0.6)        | 4.9 (0.5)         | 0.6 (0.7)                | 4.7 (0.4)             | 5.0 (0.8)              | 0.3 (0.8)                | -0.3 (1.1)                | 0.40      |
| Intention                     | 5.3 (1.1)        | 5.6 (1.0)         | 0.4 (1.1)                | 5.2 (1.3)             | 6.1 (0.6)              | 0.9 (1.6)                | 0.5 (2.0)                 | 0.36      |
| Planning                      |                  |                   |                          |                       |                        |                          |                           |           |
| Sitting Self-efficacy         | 14.9 (4.3)       | 17.2 (1.9)        | 2.3 (4.3)                | 15.4 (3.8)            | 15.2 (3.3)             | -0.2 (3.6)               | -2.6 (5.8)                | 0.63      |
| Planning                      | 1.4 (0.6)        | 2.1 (0.8)         | 0.6 (1.2)                | 1.6 (0.9)             | 2.7 (0.7)              | 1.1 (1.2)                | 0.4 (1.7)                 | 0.42      |
| Wellbeing                     |                  |                   |                          |                       |                        |                          |                           |           |
| WEMWBS                        | 50.6 (4.8)       | 50.6 (6.1)        | 0.0 (3.2)                | 51.0 (8.1)            | 53.2 (8.9)             | 2.2 (10.9)               | 2.2 (9.5)                 | 0.27      |
| Positive affect               | 35.4 (4.9)       | 33.4 (5.8)        | -2.0 (3.6)               | 32.1 (7.2)            | 35.6 (5.7)             | 3.4 (9.9)                | 5.4 (10.7)                | 0.72      |
| Negative affect               | 16.1 (4.9)       | 15.1 (5.2)        | -1.0 (4.6)               | 16.6 (6.6)            | 14.6 (4.1)             | -2.0 (6.6)               | -1.0 (8.1)                | 0.18      |
| Life satisfaction             | 6.4 (2.5)        | 6.4 (2.1)         | 0.0 (2.5)                | 6.9 (1.5)             | 7.3(1.7)               | 0.4 (2.1)                | 0.4 (3.8)                 | 0.17      |
| Worthwhileness                | 8.0 (1.9)        | 7.4 (0.7)         | -0.6 (2.1)               | 7.4 (1.5)             | 7.7 (1.3)              | 0.2 (1.4)                | 0.8 (2.6)                 | 0.45      |
| Happiness                     | 7.8 (2.0)        | 7.3 (1.6)         | -0.4 (2.8)               | 7.2 (1.5)             | 7.8 (1.3)              | 0.6 (2.1)                | 1.0 (4.2)                 | 0.40      |
| Anxiety                       | 3.0 (2.8)        | 2.6 (1.9)         | -0.4 (1.6)               | 2.78 (2.1)            | 2.78 (2.3)             | 0.0 (1.6)                | 0.4 (2.5)                 | 0.25      |

Note: WEMWBS—Warwick-Edinburgh Mental Well-being Scale.
