# Supplementary material for: Randomised Controlled Feasibility Study of the MyHealthAvatar-Diabetes Smartphone App for Reducing Prolonged Sitting Time in Type 2 Diabetes Mellitus
Source: Int J Environ Res Public Health. 2020 Jun 19;17(12):4414. doi: 10.3390/ijerph17124414 (PMC7345154; doi:10.3390/ijerph17124414)
Supplement: Supplementary file 1 [file ijerph-17-04414-s001.zip]

Archive with 9 entries (9 files):
- Supplemantary figure S1.pdf
- Supplementary figure S2 MHS app screenshots.docx
- Supplementary figure s2 MHS app screenshots.pdf
- Supplementary File S1 Intervention text message content.docx
- Supplementary File S1 Intervention text message content.pdf
- Supplementary Table S1 - CONSORT 2010 Checklist v1.docx
- Supplementary Table S1 - CONSORT 2010 Checklist v1.pdf
- Supplementary table S2 - psychological outcomes.docx
- Supplementary table s2 - psychological outcomes.pdf
