# Supplementary figures and images for: Randomised Controlled Feasibility Study of the MyHealthAvatar-Diabetes Smartphone App for Reducing Prolonged Sitting Time in Type 2 Diabetes Mellitus
Source: MDPI journal article supplement (doi:10.3390/ijerph17124414), 2020-06-19

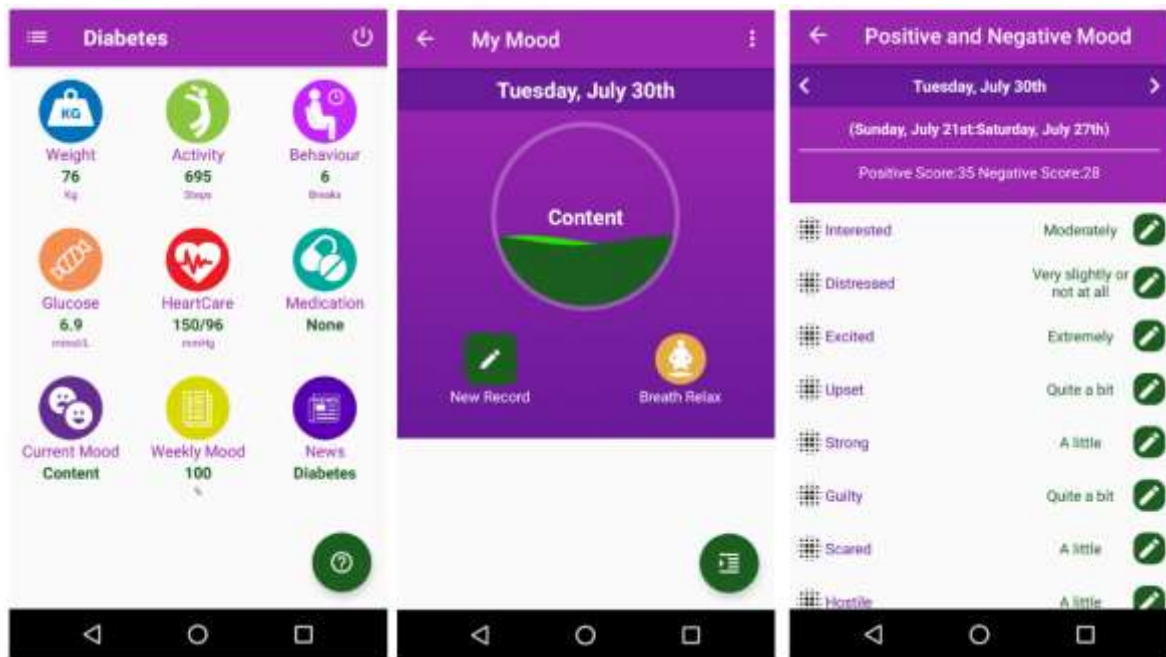

Figure S2: MyHealthAvatar-Diabetes app health and lifestyle suites.

Supplement: s1 [file s1]

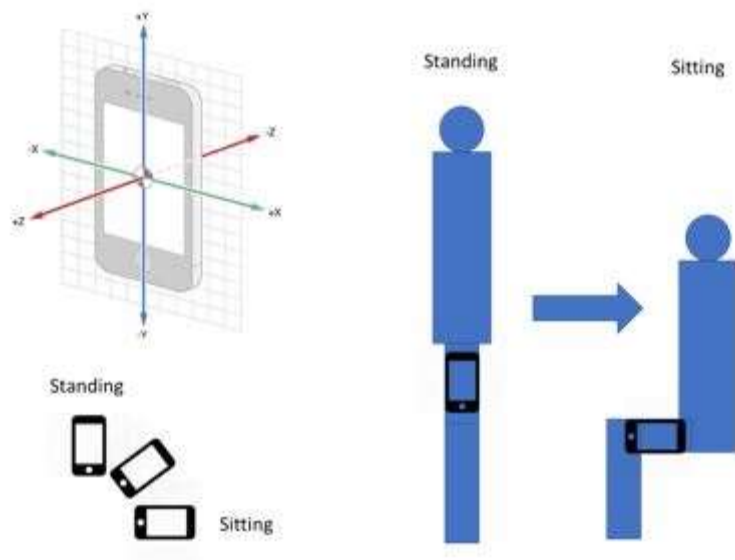

Figure S1: Sitting Detection Monitoring in the MyHealthAvatar-Diabetes app.

Supplement: s1 [file s1]
